# Supplementary material for: DNase-targeted natural product screening based on a sensitive and selective DNase I detecting system
Source: Royal Society of Chemistry journal article supplement (doi:10.1039/c7ra04911k), 2017-01-01
Supplement: c7ra04911k1.pdf [file c7ra04911k1.pdf]

## Supplemental Data

**Fig. S1**

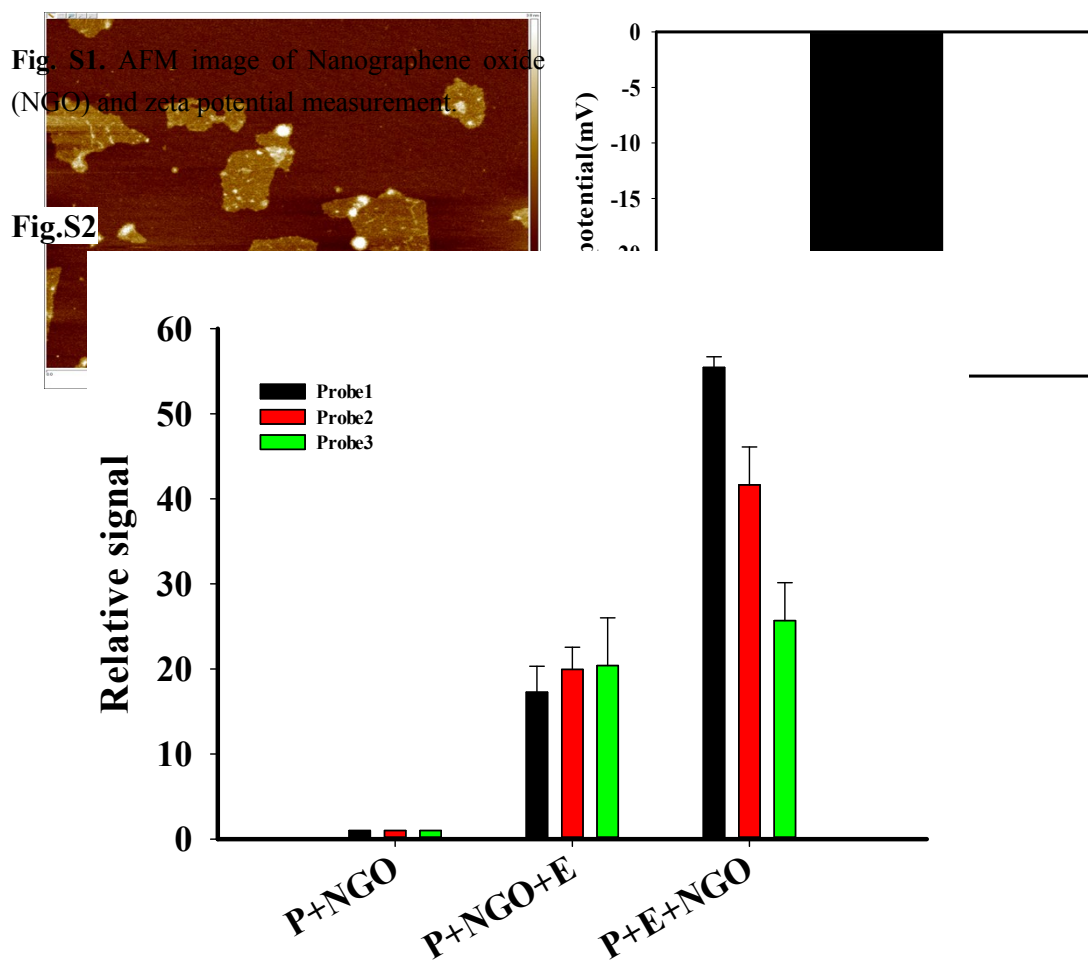

**Fig.S2.** The S/N detection of NGO-quenched Probe1, Probe2 and Probe3 at optimal conditions.

[NGO]=12  $\mu\text{g/mL}$ , [Probe]=100nM.

**Fig. S3**

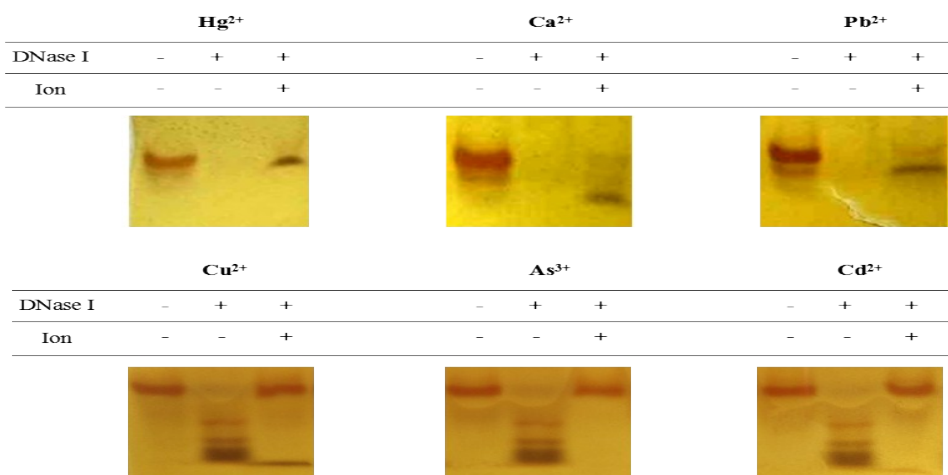

**Fig. S3.** Investigating the effects of metal ions on DNase I using PAGE method.

**Fig. S4**

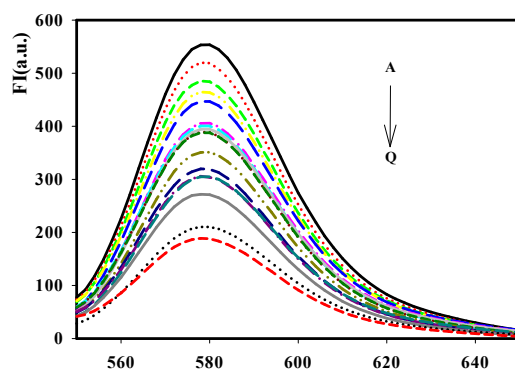

**Fig. S4.** The wavelength scan results of enzymatic products at the presence of natural compounds. The compounds in samples A to Q are C-H-4, chikusetsusaponin V, C-G-9, C-G-6, C-G-10, chikusetsusaponin IV, C-H-2, chikusetsusaponin Iva, C-H-3, C-H-1, Control, C-G-13, C-G-11, SBB-L-1, C-G-8, Schisanlactone E and Cyclocariol F, respectively.  $E=2U$ ,  $[P1]=100\text{ nM}$ ,  $[\text{compound}]=20\mu\text{M}$ .

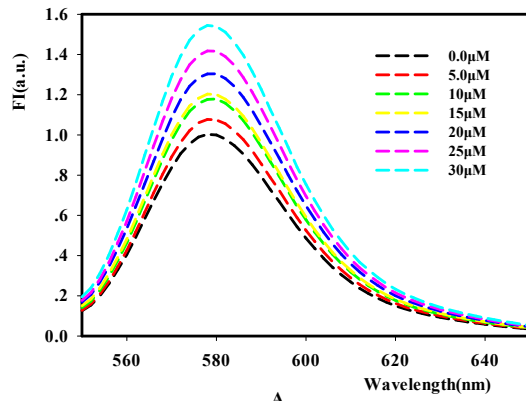

**Fig. S5**

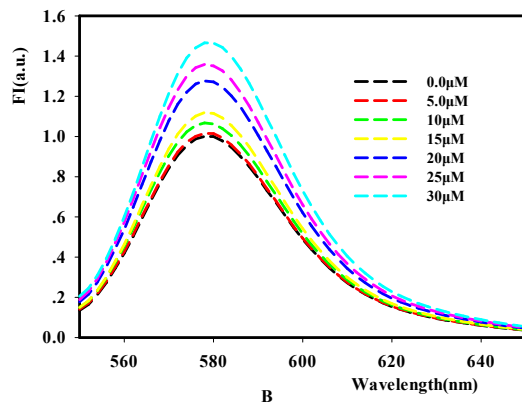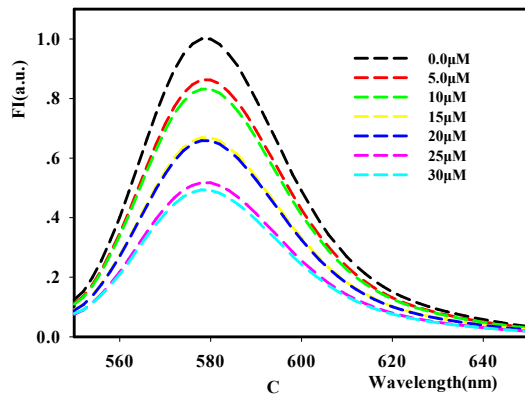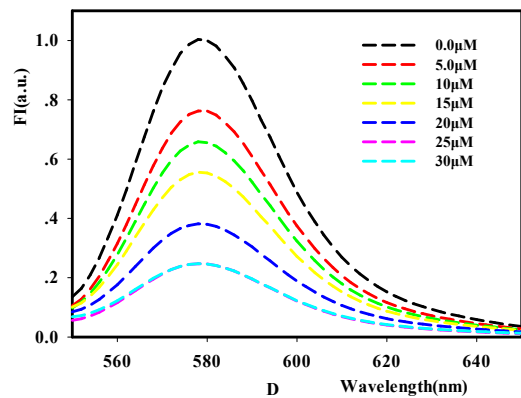

|           | Chikusetsusaponin V |   |   | C-H-4 |   |   | Schisanlactone E |   |   | Cyclocariol F |   |   |
|-----------|---------------------|---|---|-------|---|---|------------------|---|---|---------------|---|---|
| DNase I   | -                   | + | + | -     | + | + | -                | + | + | -             | + | + |
| Activator | -                   | - | + | -     | - | + | -                | - | + | -             | - | + |
|           |                     |   |   |       |   |   |                  |   |   |               |   |   |

**Fig. S5.** The wavelength scan results of enzymatic products at the presence of selected natural compounds with different concentration. Compounds of Sample A to D are chikusetsusaponinV, C-H-4, Schisanlactone E and Cyclocariol F, respectively.

**Fig. S6**

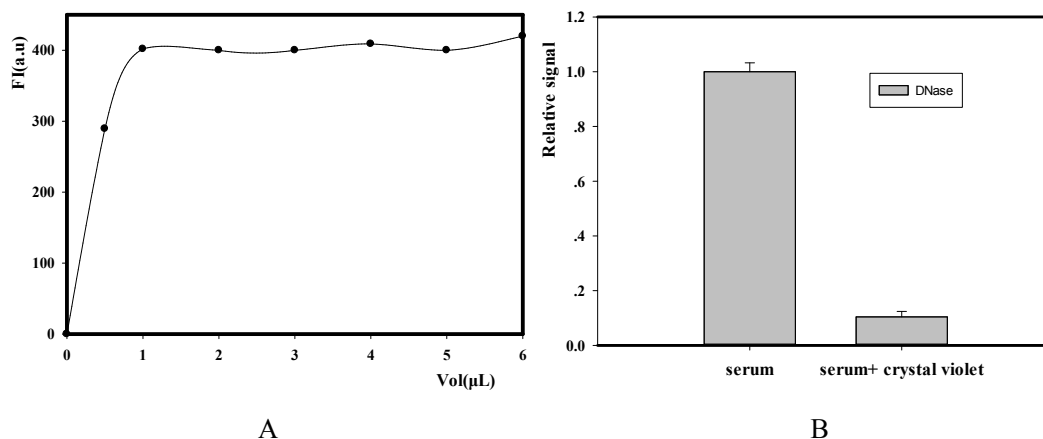

**Fig. S6.** Fluorescence-based measurement of DNase. (A) DNase I assay with different amount of serum; (B) The sample was heated at 95°C for 10min.

### Supplemental table

**Table S1**

Table S1 oligonucleotide strands with modifications

| Name   | Sequences                                                       |
|--------|-----------------------------------------------------------------|
| Probe1 | 5'- TAMRA -CTCAACAGACACATGGGGTTC(GATGCG)-3'                     |
| Probe2 | 5'- TAMRA -CGCATCAGACACATGGGGTTC(GATGCG)-3' (hairpin structure) |
| Probe3 | 5'- TAMRA- CGCATCAGACACATGGGG(CTGATGCG)-3' (hairpin structure)  |

**Table S2**

Table S2 Description of the two strong inhibitors

| Code             | Molecular formula                              | Molecular Weight | Chemical Name                                                                                                                                                                               | Structure | Note           |
|------------------|------------------------------------------------|------------------|---------------------------------------------------------------------------------------------------------------------------------------------------------------------------------------------|-----------|----------------|
| Schisanlactone E | C <sub>30</sub> H <sub>44</sub> O <sub>4</sub> | 468.68           | 3-((3aS,6aR,7aS,9aR)-3a,9a-dimethyl-1-((1S)-1-(5-methyl-6-oxo-3,6-dihydro-2H-pyran-2-yl)ethyl)-6-(prop-1-en-2-yl)decahydro-1H-cyclopenta[a]cyclopropa[e]naphthalen-6a(7H)-yl)propanoic acid |           | known compound |
| Cyclocariol F    | C <sub>32</sub> H <sub>54</sub> O <sub>5</sub> | 518.3971         | 12R,20S-dihydroxy-25-methoxy-3,4-secodammara-4(28),23-dien-3-oic acid ethyl ester                                                                                                           |           | New compound   |

**Table S3**

Table S3 Advantage comparison of different methods.

| Strategy                     | Detection modes | Limit of Detection             | Km                            | Technology Characteristics                                                                                                                   | References                 |
|------------------------------|-----------------|--------------------------------|-------------------------------|----------------------------------------------------------------------------------------------------------------------------------------------|----------------------------|
| Colormetric assay            | colormetric     | --                             | --                            | DNA-AuNP aggregates used to evaluate the enzymatic activity of DNase I                                                                       | Xu et al., 2007            |
| Electrochemical assay        | current peaks   | $10^{-4}$ U $\mu\text{L}^{-1}$ | --                            | Fc-oligo-SH-immobilized electrode; was used to detection of DNase I activity                                                                 | Shinobu Sato et al., 2008  |
| Fluorescent assay            | fluorescence    | 5 pg                           | --                            | Double stranded DNA, Pico Green dye; was used to detection of DNase I activity and DNase I inhibitor activity                                | Suk-Jung Choi et al., 2000 |
| Real-time fluorescent assay  | fluorescent     | $1.75$ U $\text{mL}^{-1}$      | --                            | GO and a fluorescent dye fluorescein amidite (FAM) -labeled dsDNA substrate (F-dsDNA) ;used for real-time nuclease activity/inhibition assay | Zhixue Zhou et al., 2012   |
| Fluorescent assay            | fluorescence    | $1$ U $\text{mL}^{-1}$         | $1 \pm 0.10$ $\mu\text{M}$    | DNA/GO (graphene oxide) probe; used for high-throughput assay of DNase I in biological samples as well as drug screening in vitro            | Wei Xu et al. 2016         |
| Label-free fluorescent assay | fluorescence    | $0.10$ U $\text{mL}^{-1}$      | --                            | DNA-templated silver nanocluster/graphene oxide (DNA- AgNC/GO) nanocomposite was used to detect deoxyribonuclease I activity                 | Chang Yeol Lee et al. 2016 |
| End-point assay              | fluorescence    | $0.005$ U                      | $2.19 \pm 0.07$ $\mu\text{M}$ | NGO based single strand probe; used for DNase I activity, nature compounds screening and                                                     | This work                  |

**Reference:**

- Choi, S. J., Szoka, F. C., 2000. *Analytical Biochemistry*, 281(1):95-97.
- Lee, C. Y., Park, K. S., Jung, Y. K., Park, H. G., 2016. *Biosensors & Bioelectronics*, In Press.
- Sato, S., Fujita, K., Kanazawa, M., Mukumoto, K., Ohtsuka, K., Waki, M., Takenaka, S., 2008. *Analytical Biochemistry*, 381(2):233-239.
- Xu, W., Xie, Z.H., Tong, C.Y., Peng, L., Xiao, C.H., Liu, X.M., Zhu, Y.H., Liu, B., 2016. *Analytical and Bioanalytical Chemistry*, 408(14):3801-3809.
- Xu, X., Han, M. S., Mirkin, C. A., 2007. *Angewandte Chemie*, 119(19): 3538- 3540.
- Zhou, Z., Zhu, C., Ren, J., Dong, S., 2012. *Analytica Chimica Acta*, 740:88-92.
